# Supplementary material
Source: publisher figshare collection journal article supplement (https://future-science-group.figshare.com/ndownloader/files/34720990)
Supplement: Supplementary file 1 [file 34720990]

Supplementary Table 1. Multivariable Cox regression analysis for factors affecting overall and cancer-specific survival among patients with typical carcinoid histology.

| Parameters | Overall survival | Cancer-specific survival |
| --- | --- | --- |
| HR (95% CI) | HR (95% CI) |
| Age | 1.055 (1.050-1.059) | 1.038 (1.032-1.044) |
| Race  White  Black  Asian/ Pacific Islander  American Indian | Reference  1.20 (1.03-1.39)  0.82 (0.61-1.11)  0.56 90.23-1.34) | Reference  1.11 (0.88-1.41)  1.15 (0.76-1.74)  0.92 (0.30-2.86) |
| SEER summary stage  Localized  Distant  Regional | Reference  1.97 (1.77-2.20)  1.40 (1.25-1.57) | Reference  4.21 (3.56-4.98)  2.17(1.80-2.60) |
| Sex  Females  Males | Reference  1.69 (1.55- 1.85) | Reference  2.09 (1.82-2.40) |
| Surgery to the primary tumor  Lobectomy  None  Sub lobar resection  Pneumonectomy | Reference  2.97 (2.65-3.32)  1.28 (1.14-1.44)  1.80 (1.33-2.44) | Reference  3.67 (3.04-4.42)  0.98 (0.80-1.25)  2.29 (1.49-3.51) |

Supplementary Table 2. Multivariable Cox regression analysis for factors affecting overall and cancer-specific survival among patients with atypical histology.

| Parameters | Overall survival | Cancer-specific survival |
| --- | --- | --- |
| HR (95% CI) | HR (95% CI) |
| Age | 1.035 (1.026-1.044) | 1.031 (1.021-1.042) |
| Race  White  Black  Asian/ Pacific Islander  American Indian | Reference  1.30 (0.97-1.74)  1.10 (0.65-1.85)  1.35 (0.19-9.68) | Reference  1.25 (0.88-1.78)  1.14 (0.62-2.11)  2.54 (0.35-18.42) |
| SEER summary stage  Localized  Distant  Regional | Reference  2.69 (2.05-3.54)  1.51 (1.17-1.96) | Reference  3.87 (2.74-5.45)  2.06 (1.49-3.70) |
| Sex  Females  Males | Reference  1.13 (0.92-1.38) | Reference  1.10 (0.87-1.40) |
| Surgery to the primary tumor  Lobectomy  None  Sub lobar resection  Pneumonectomy | Reference  4.00 (3.08-5.20)  1.11 (0.81-1.52)  1.90 (1.13-3.22) | Reference  4.40 (3.20-6.03)  1.16 (0.78-1.73)  2.00 (1.08-3.70) |
